# Supplementary material for: Efficient and divergent synthesis of polyfunctionalized 2-pyridones from β-keto amides
Source: Royal Society of Chemistry journal article supplement (doi:10.1039/c8ra05709e), 2018-01-01

# Efficient and divergent synthesis of polyfunctionalized 2-pyridones from $\beta$ -keto Amides

Baochang Gao<sup>\*a,b</sup>, Yufeng Sun<sup>b</sup>, Jun Wang<sup>a</sup>, Zhigang Yuan<sup>b</sup>, Liwu Zu<sup>a</sup>, Xu Zhang<sup>b</sup>, Wenbin Liu<sup>\*a</sup>

<sup>a</sup> Institute of Composite Materials, Key Laboratory of Superlight Material and Surface Technology of  
Ministry of Education, College of Materials Science and Chemical  
Engineering, Harbin Engineering University, Harbin 150001, P. R. of China

<sup>b</sup> Daqing Branch of Heilongjiang Academy of Sciences, Daqing 163319, P. R. of China

Email Address: chemgbc@hrbeu.edu.cn; liuwenbin@hrbeu.edu.cn

## Supporting Information

### Table of contents

|                                                                                             |        |
|---------------------------------------------------------------------------------------------|--------|
| I. Experimental section.....                                                                | S2     |
| II. <sup>1</sup> H NMR and <sup>13</sup> C NMR spectra copies of synthesized compounds..... | S3-S18 |

## I. Experimental section

### 1. General procedure for the preparation of 3a-h

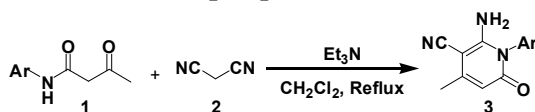

To a solution of  $\beta$ -Keto Amides **1** (1.0 mmol) and malononitrile **2** (1.1 mmol) in  $\text{CH}_2\text{Cl}_2$  (10 mL) was added  $\text{Et}_3\text{N}$  (1.0 mmol) in one portion. The mixture was well stirred for 6 hours at reflux. When consumption of **1** was complete (TLC), the mixture was washed with saturated sodium chloride solution (10 mL  $\times$  3) and dried over anhydrous  $\text{MgSO}_4$ . The organic solvent  $\text{CH}_2\text{Cl}_2$  was then removed under reduced pressure and the residue was purified by recrystallization from ethanol to give product **3a-h**.

### 2. General procedure for the preparation of 4a-h

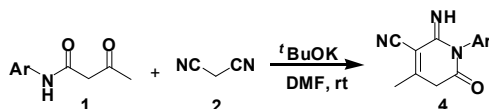

To a solution of  $\beta$ -Keto Amides **1** (1.0 mmol) and malononitrile **2** (1.1 mmol) in DMF (10 mL) was added  $t\text{BuOK}$  (1.0 mmol) in one portion. The mixture was well stirred for 4 hours at room temperature. When consumption of **1** was complete (TLC), the mixture was poured into sat. aq NaCl (50 mL) under stirring. The precipitated solid was collected by filtration, washed with water (3 $\times$ 20 mL) and dried in vacuo to afford the product **4a-h**.

## II. $^1\text{H}$ NMR and $^{13}\text{C}$ NMR spectra copies

### Compound 3a

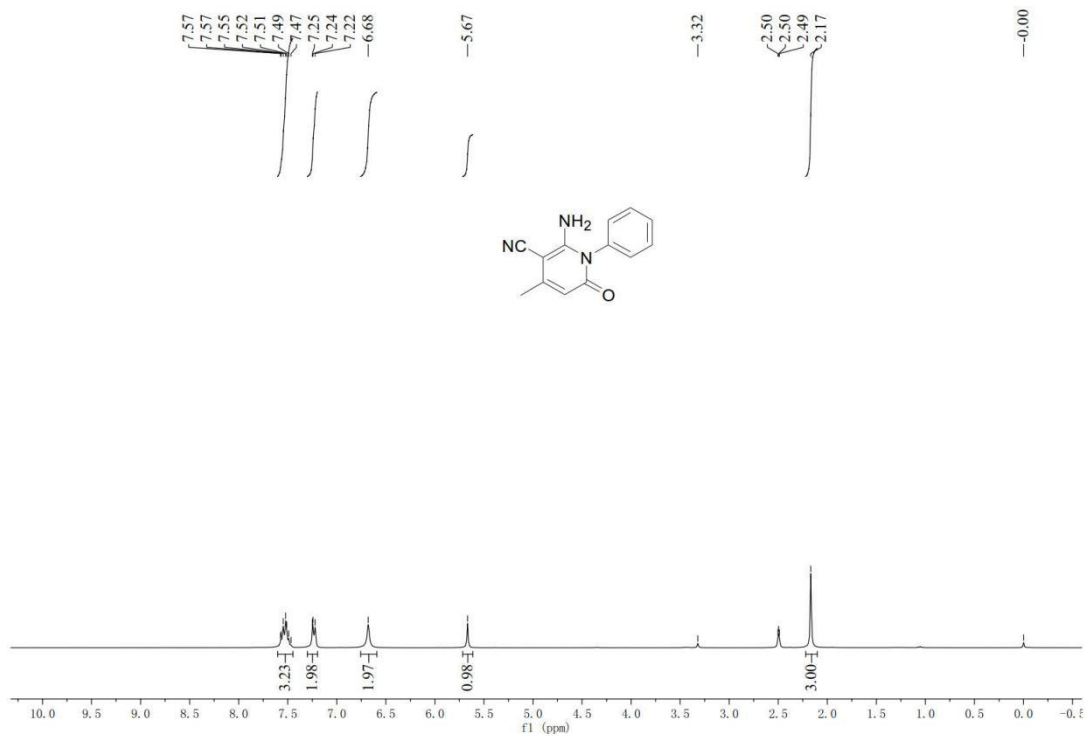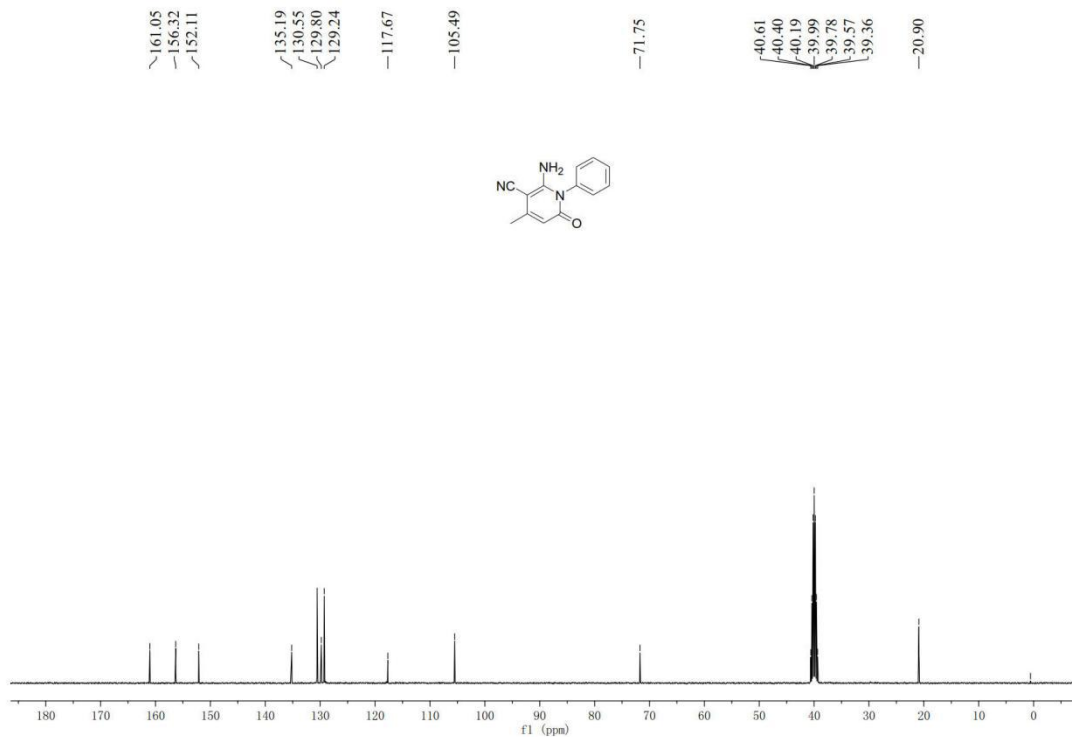

# Compound 3b

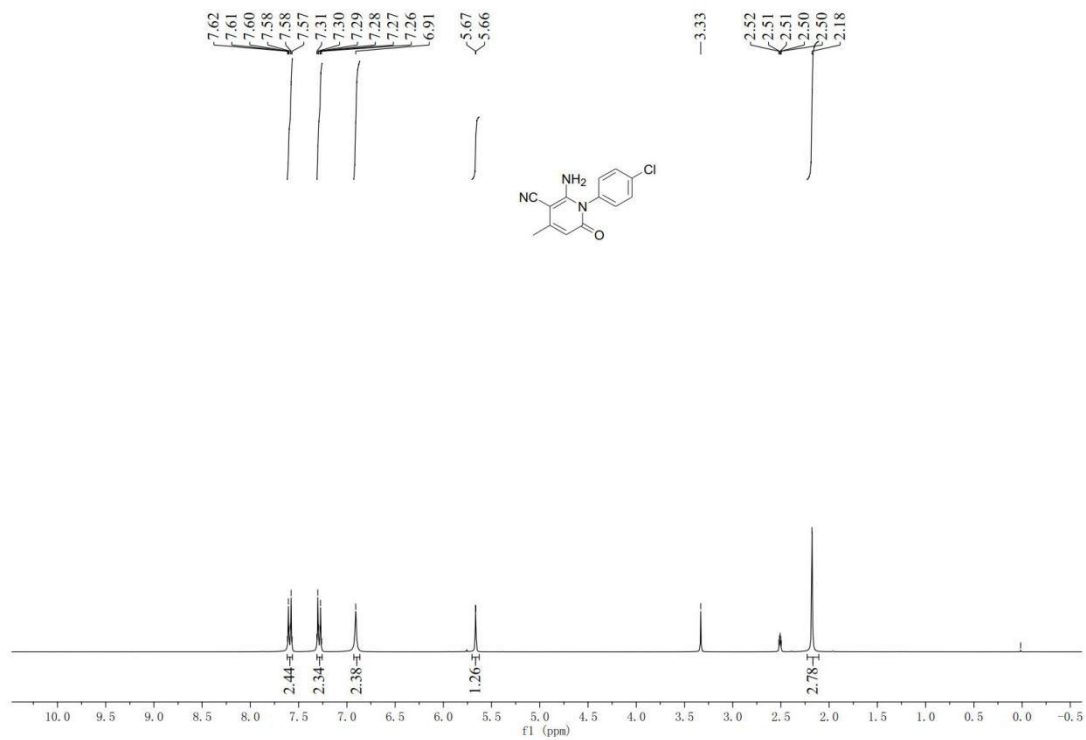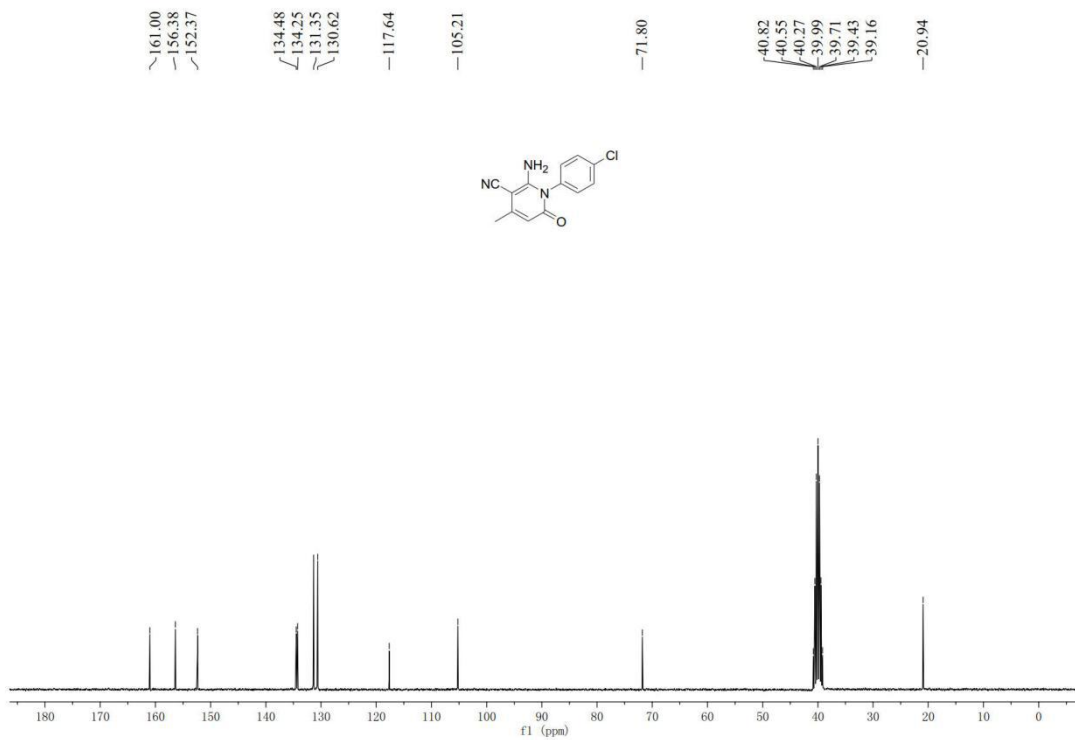

# Compound 3c

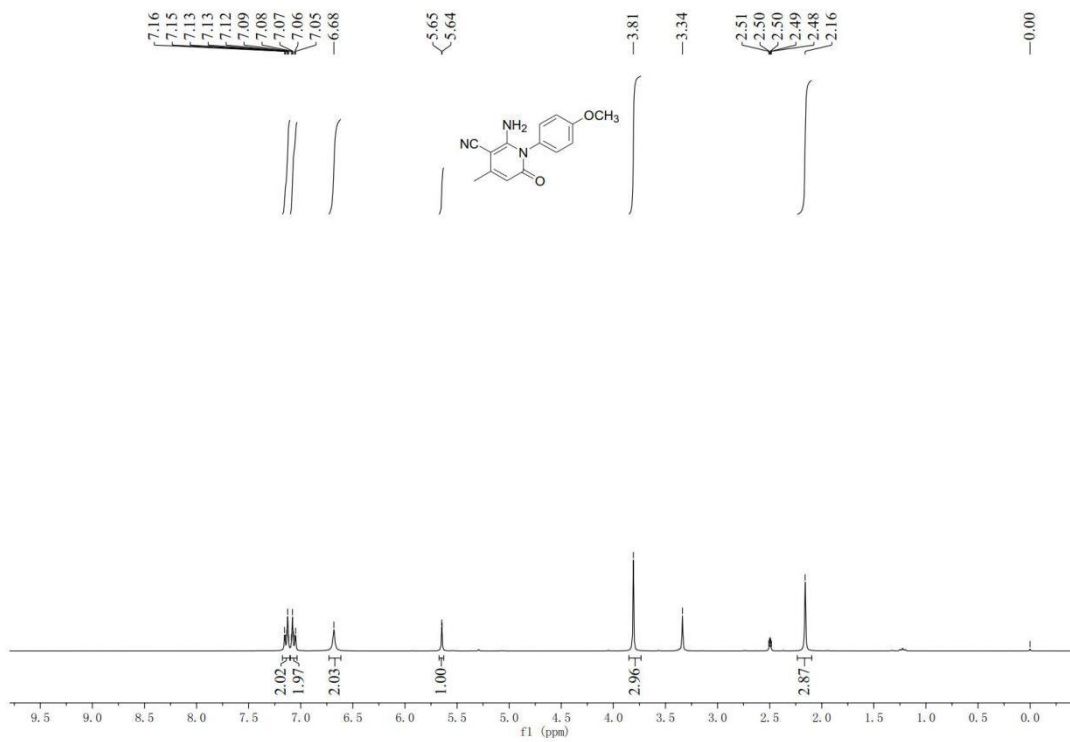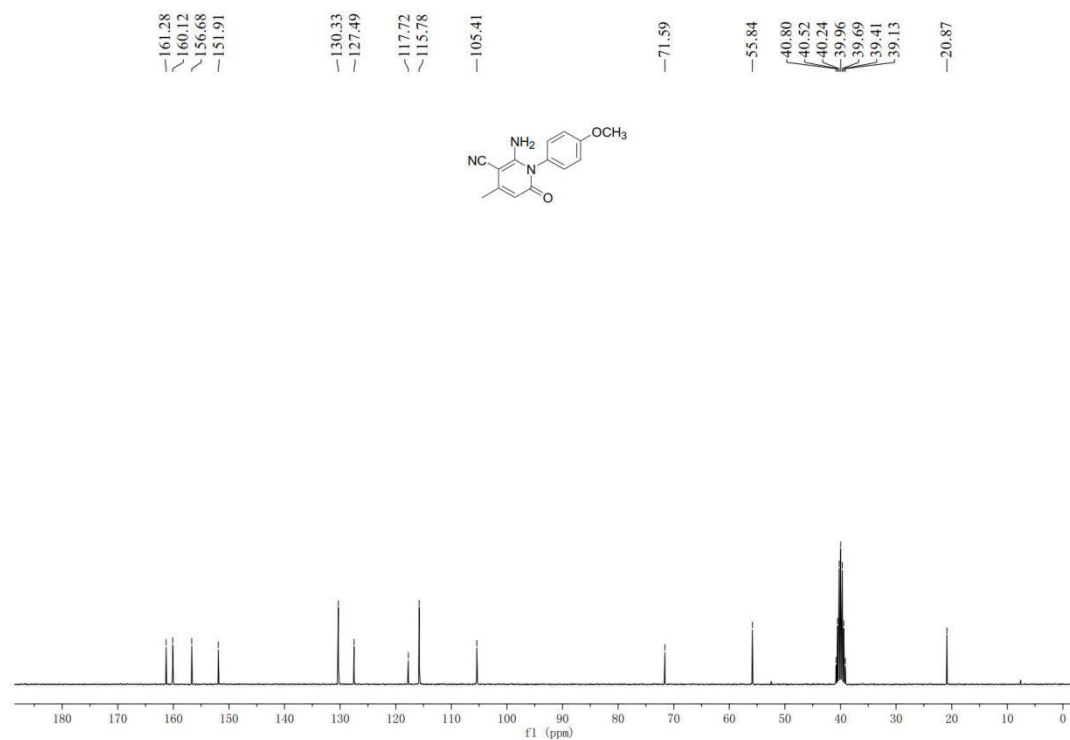

# Compound 3d

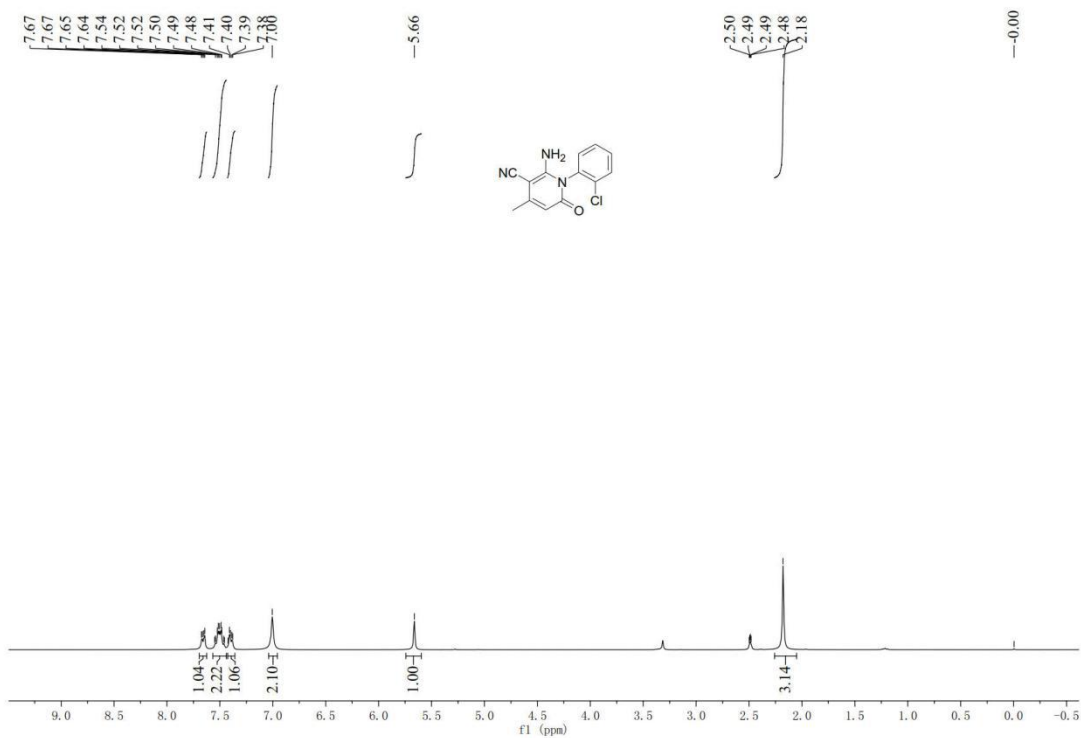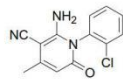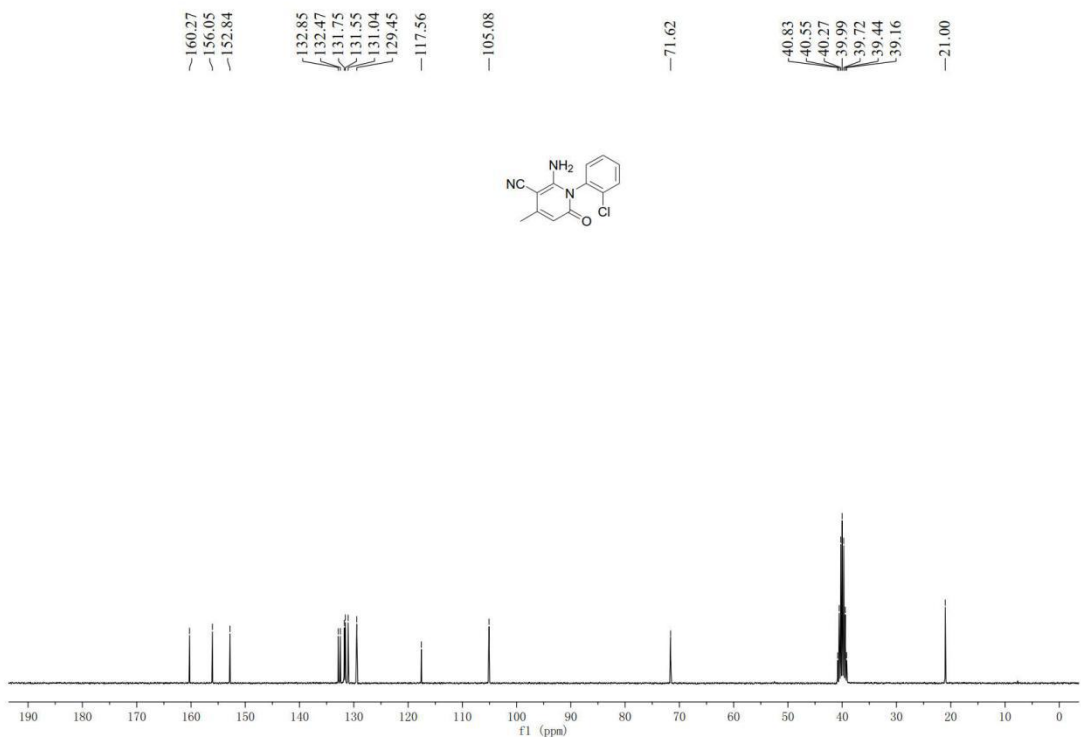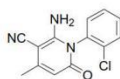

# Compound 3e

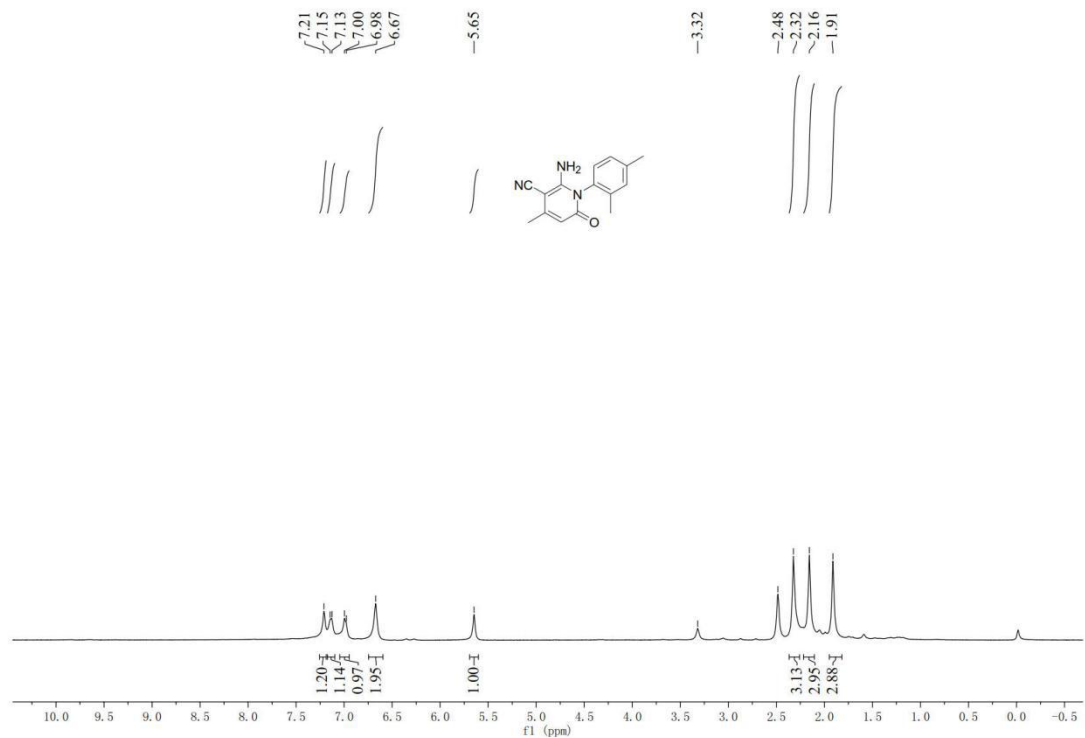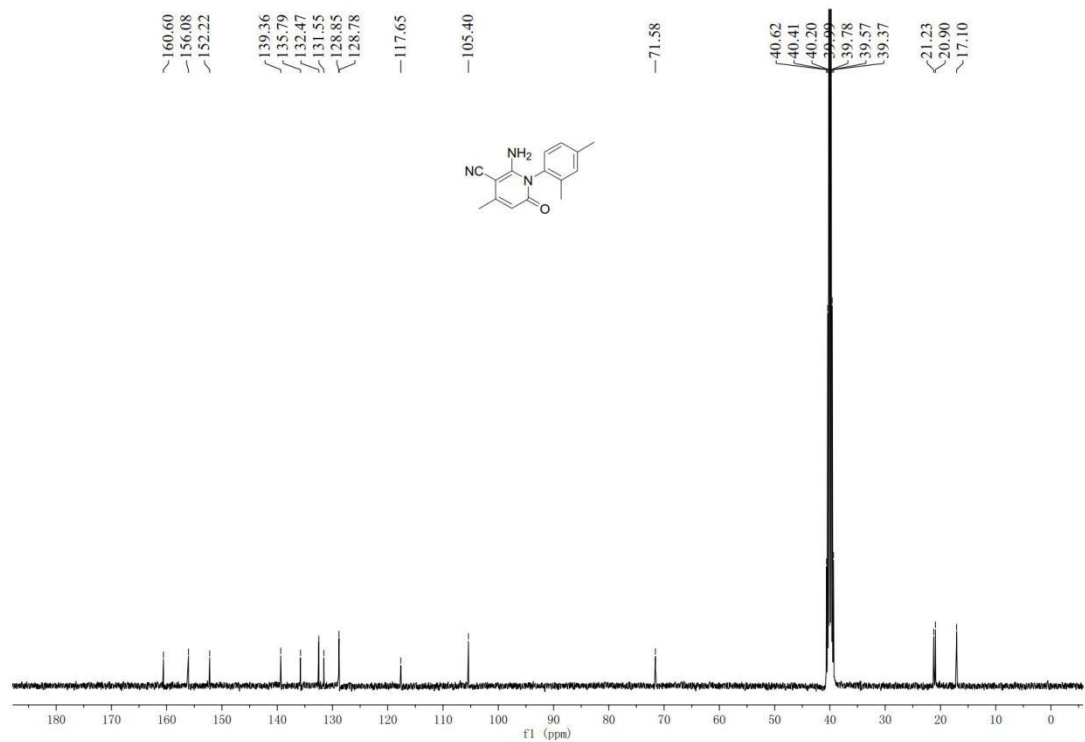

# Compound 3f

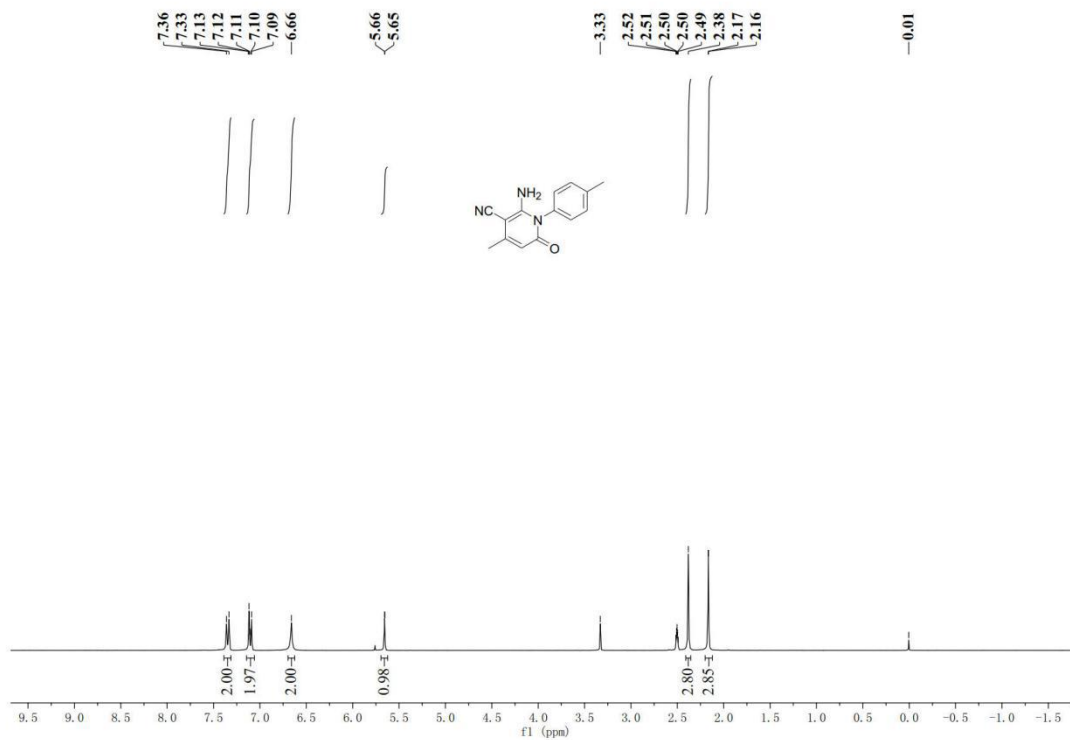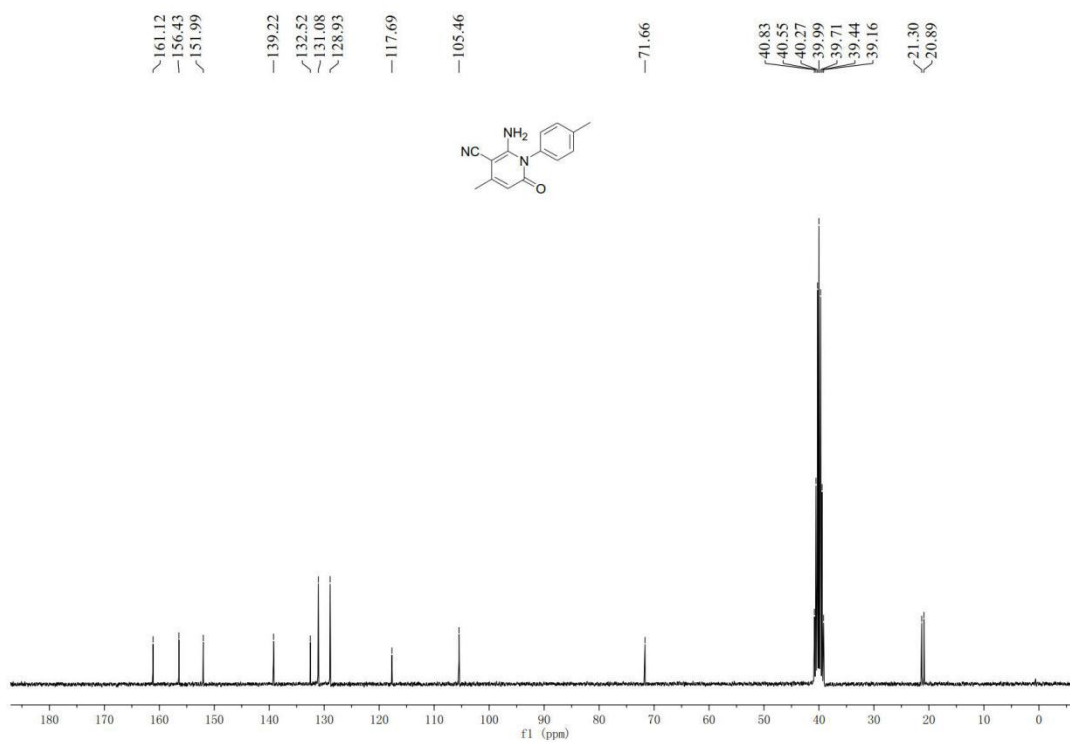



# Compound 3g

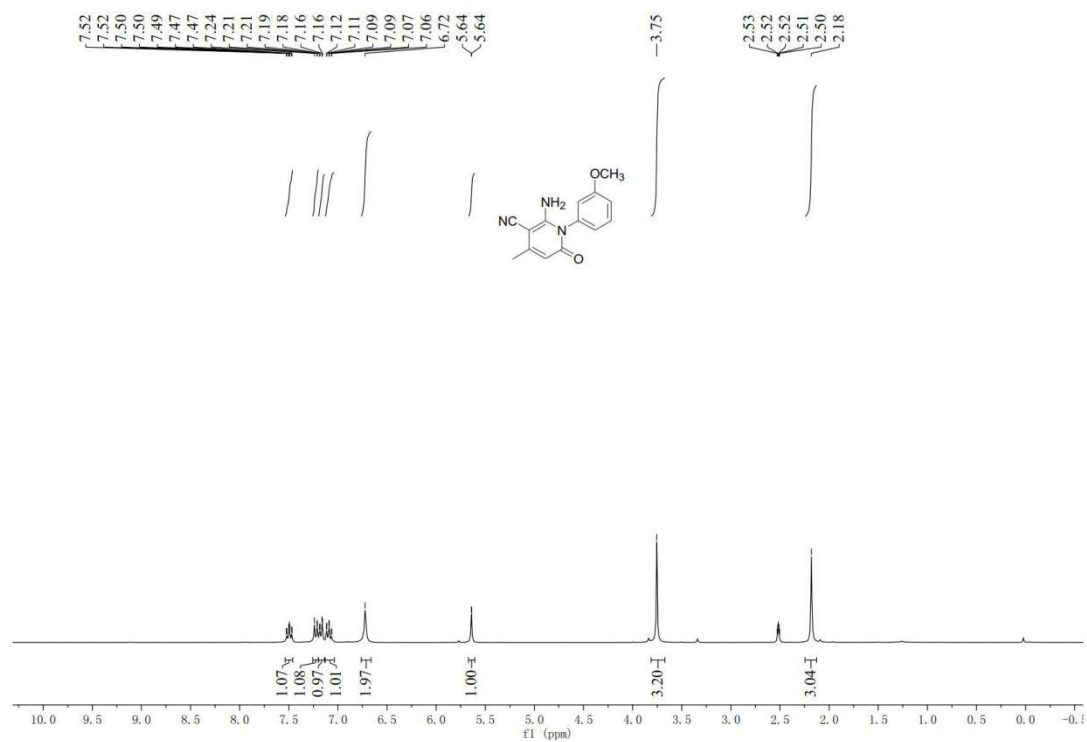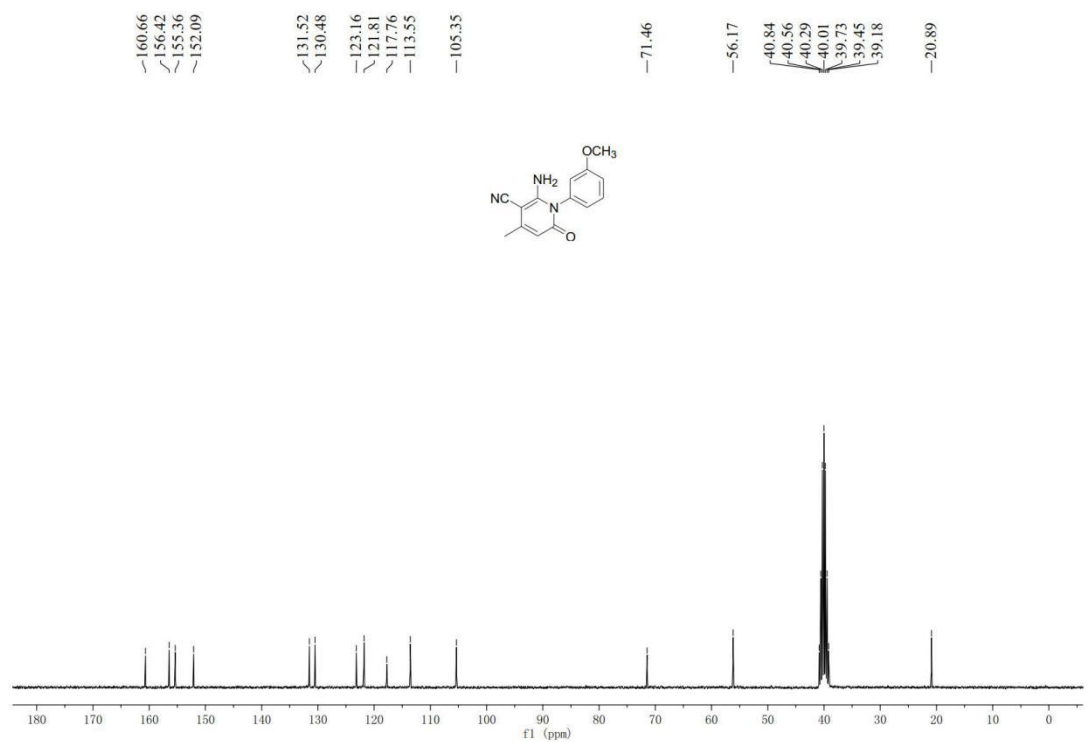

# Compound 3h

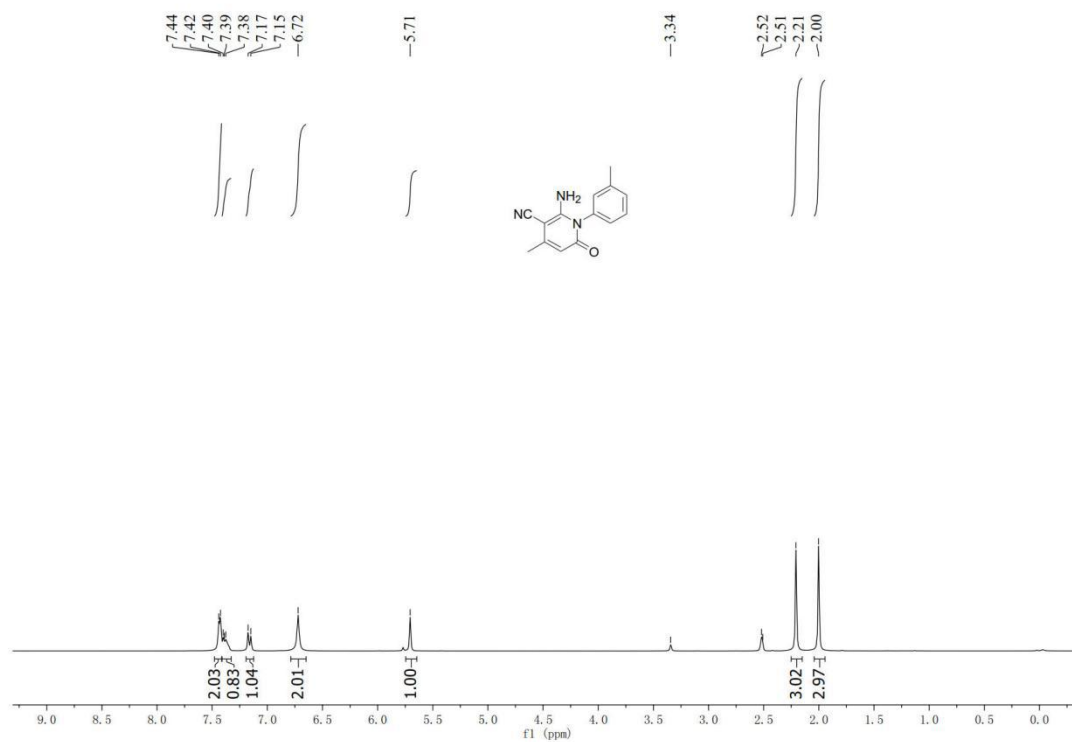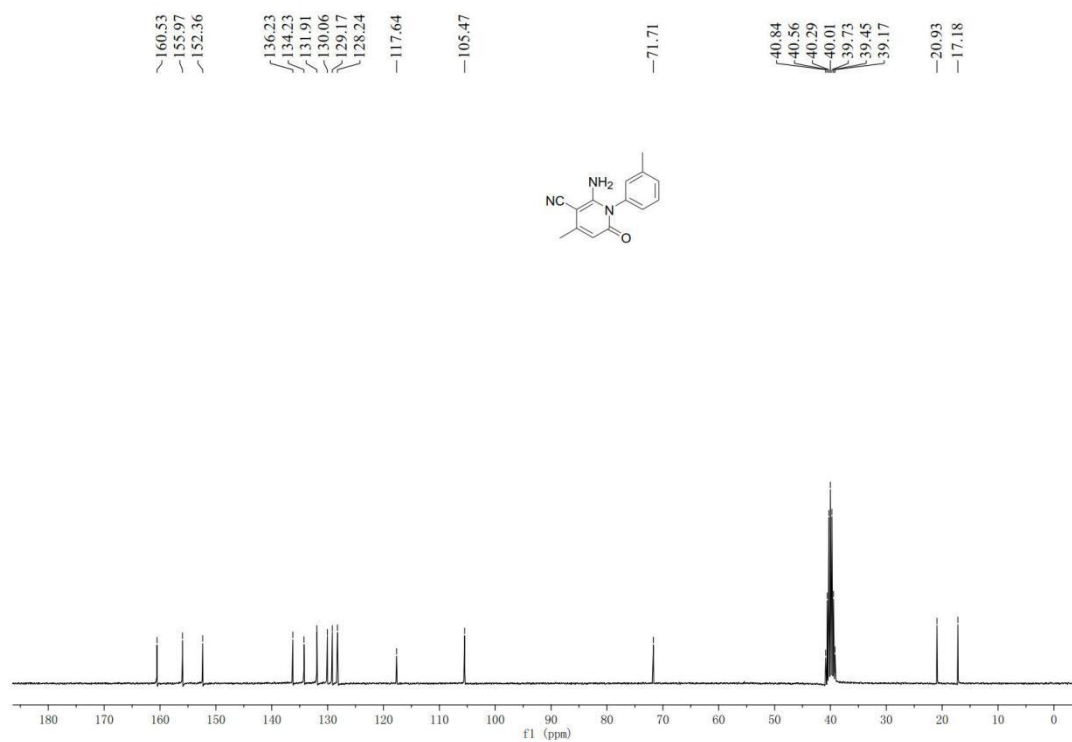

# Compound 4a

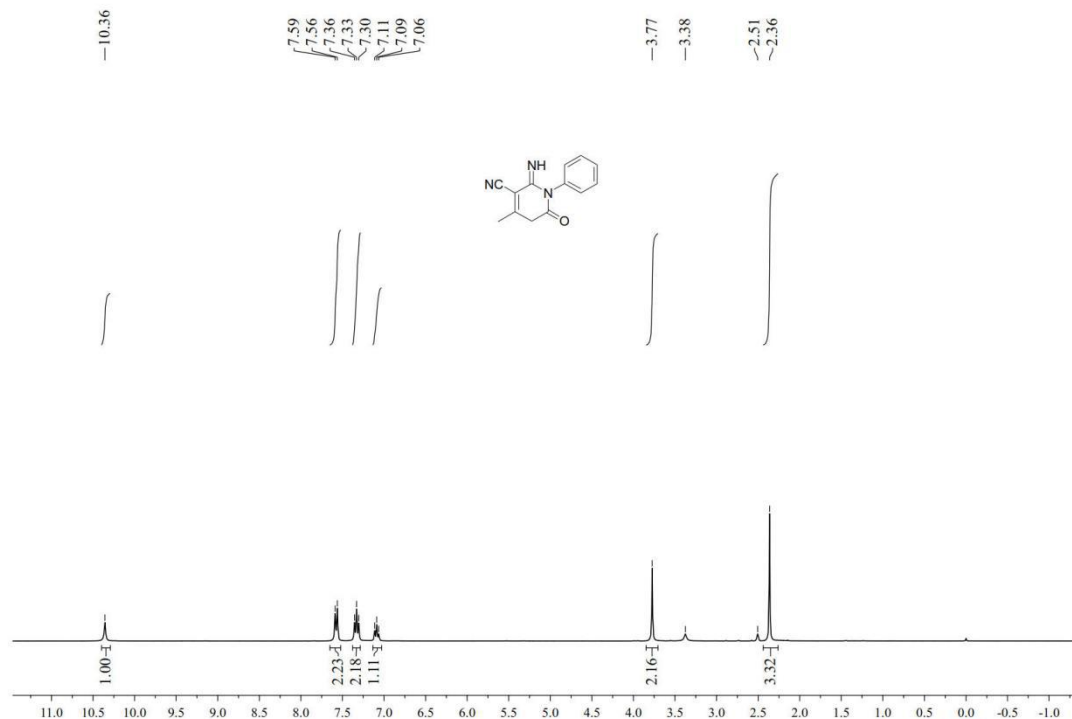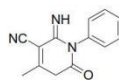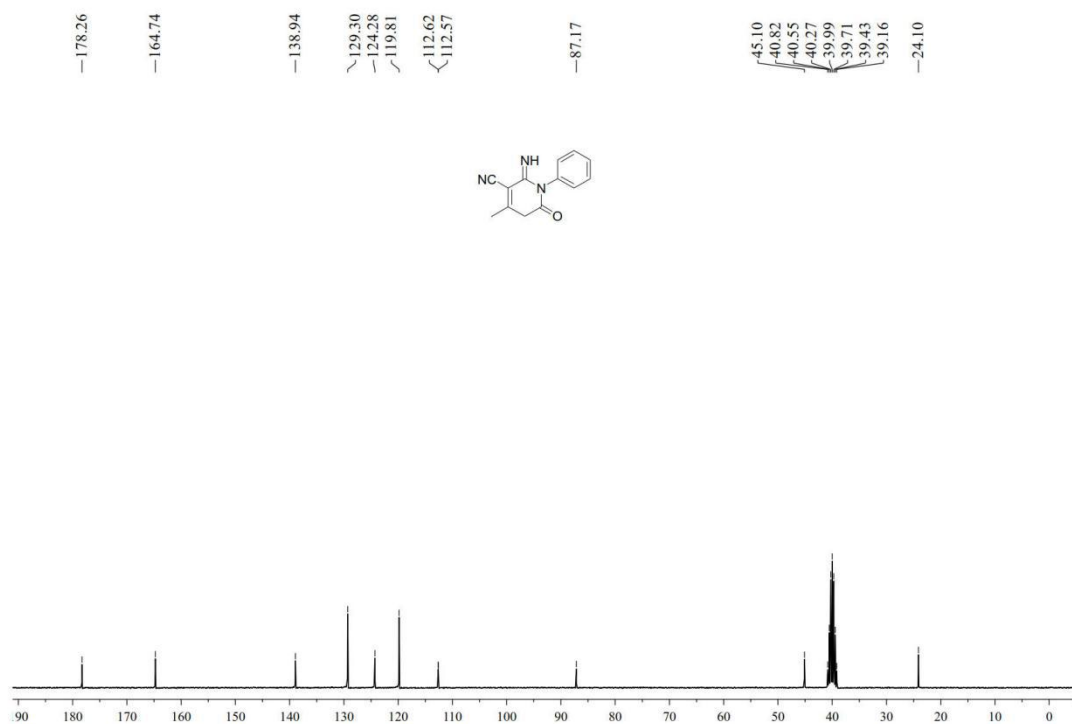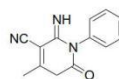

# Compound 4b

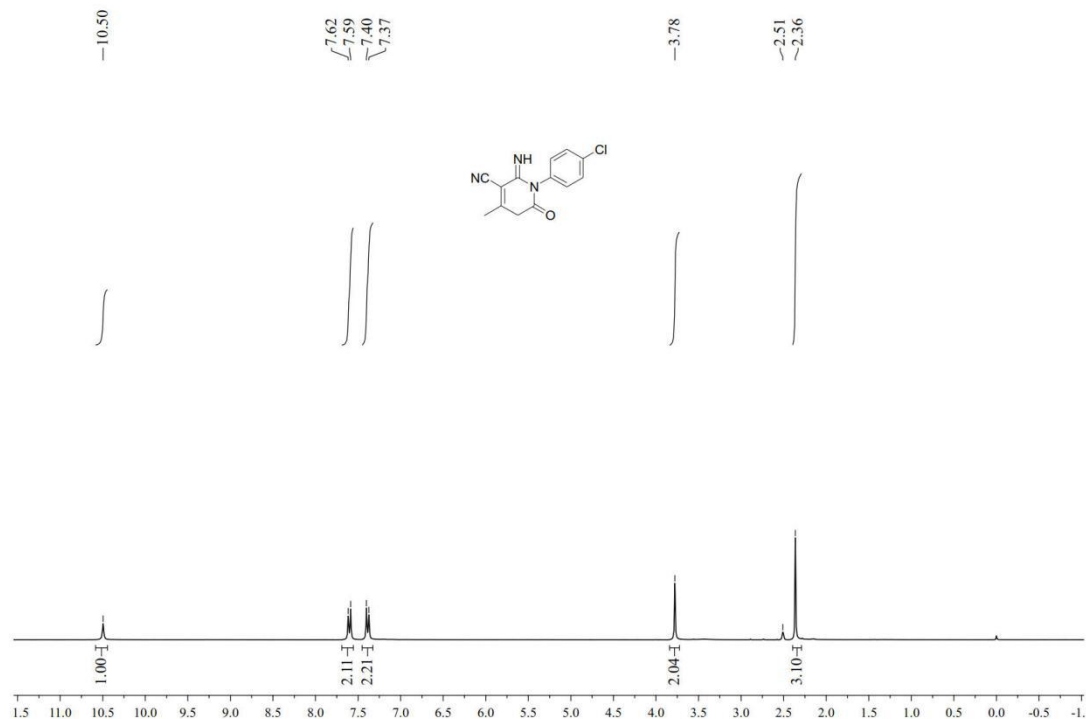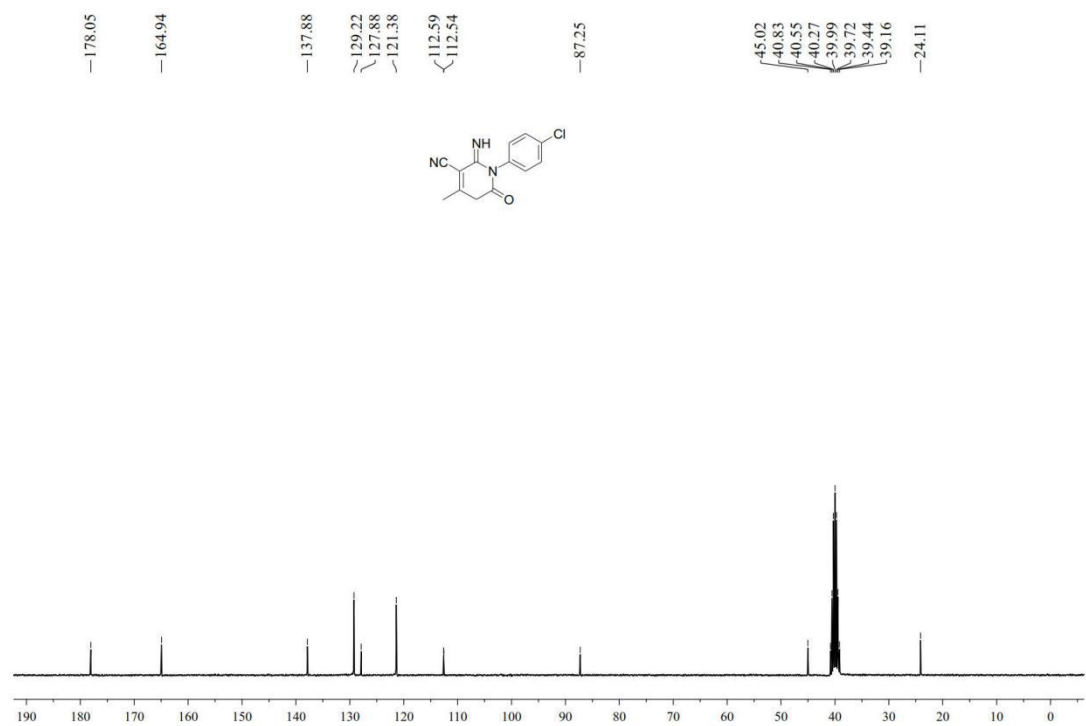

# Compound 4c

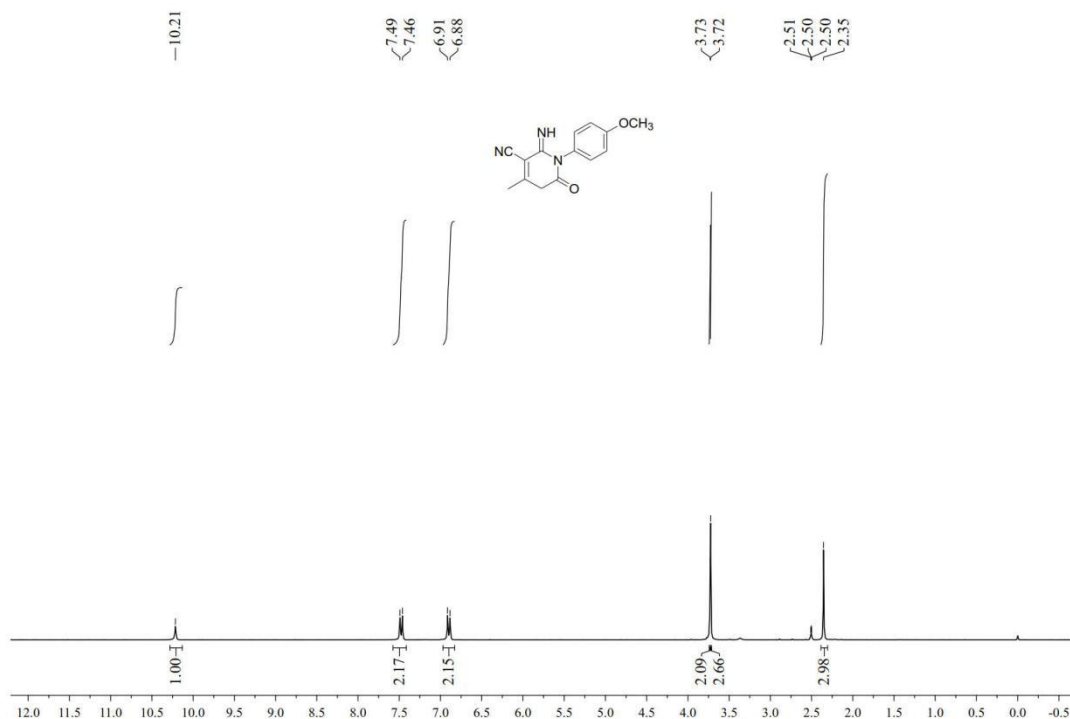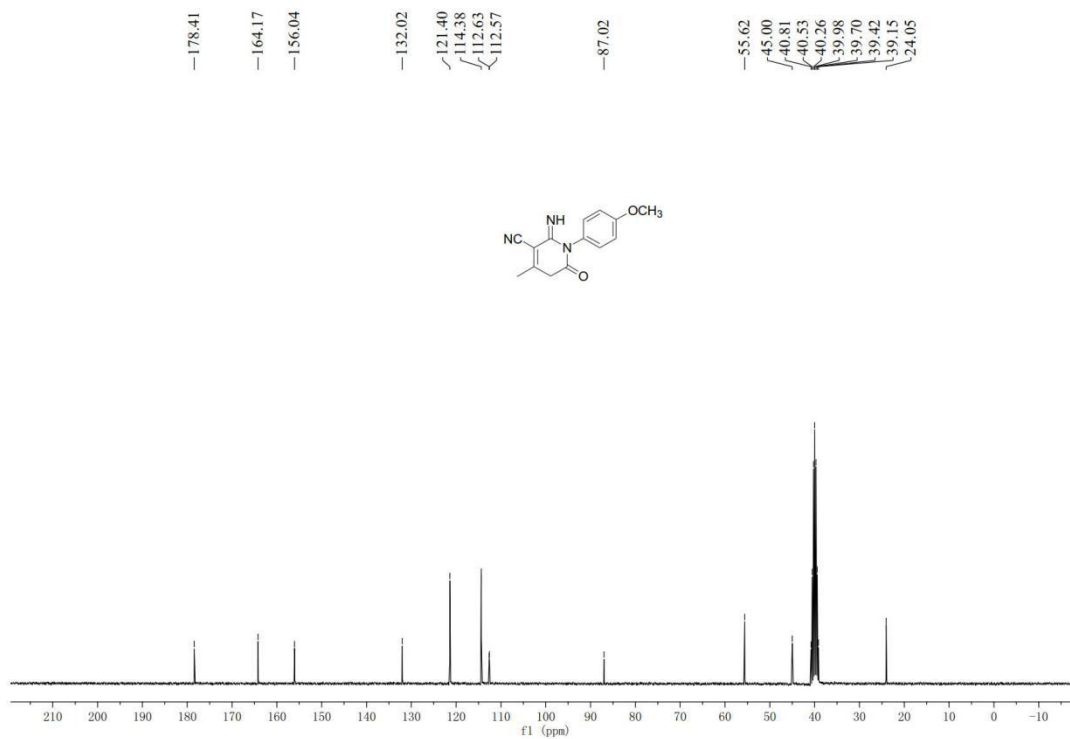

# Compound 4d

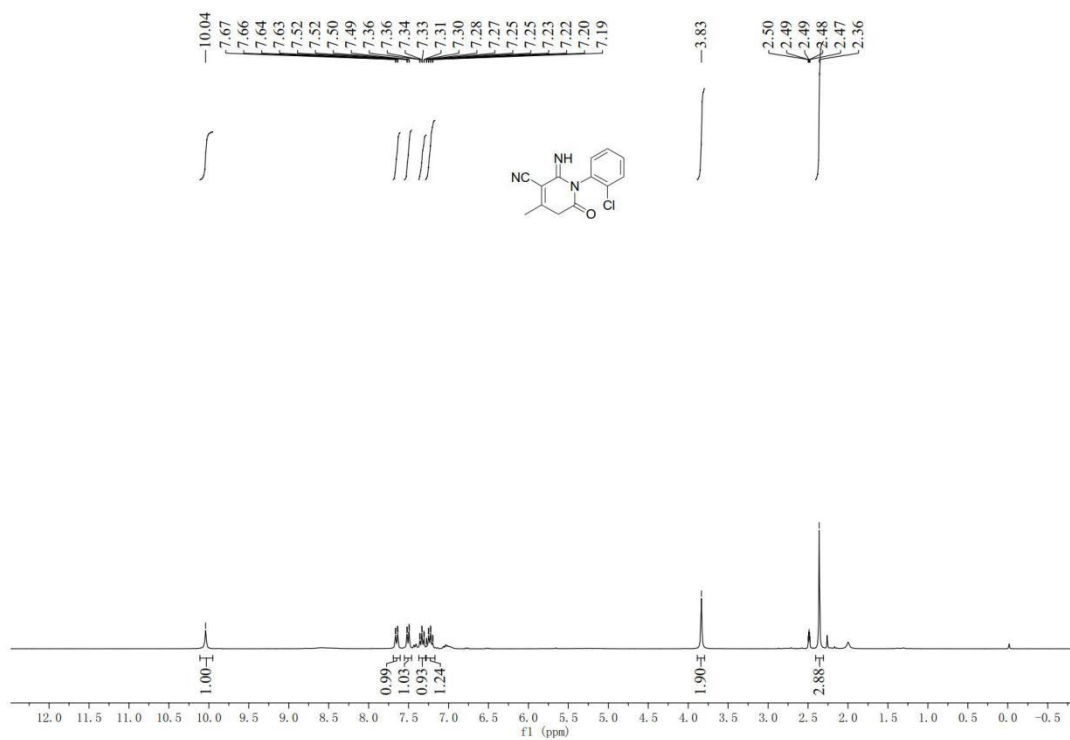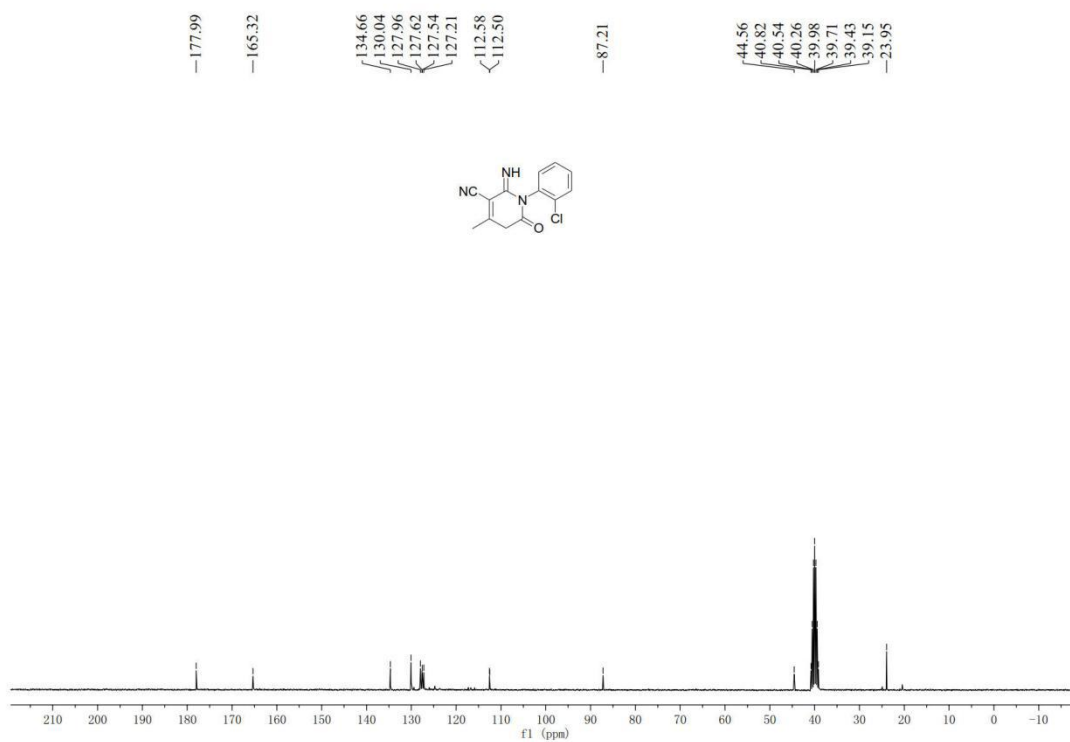

# Compound 4e

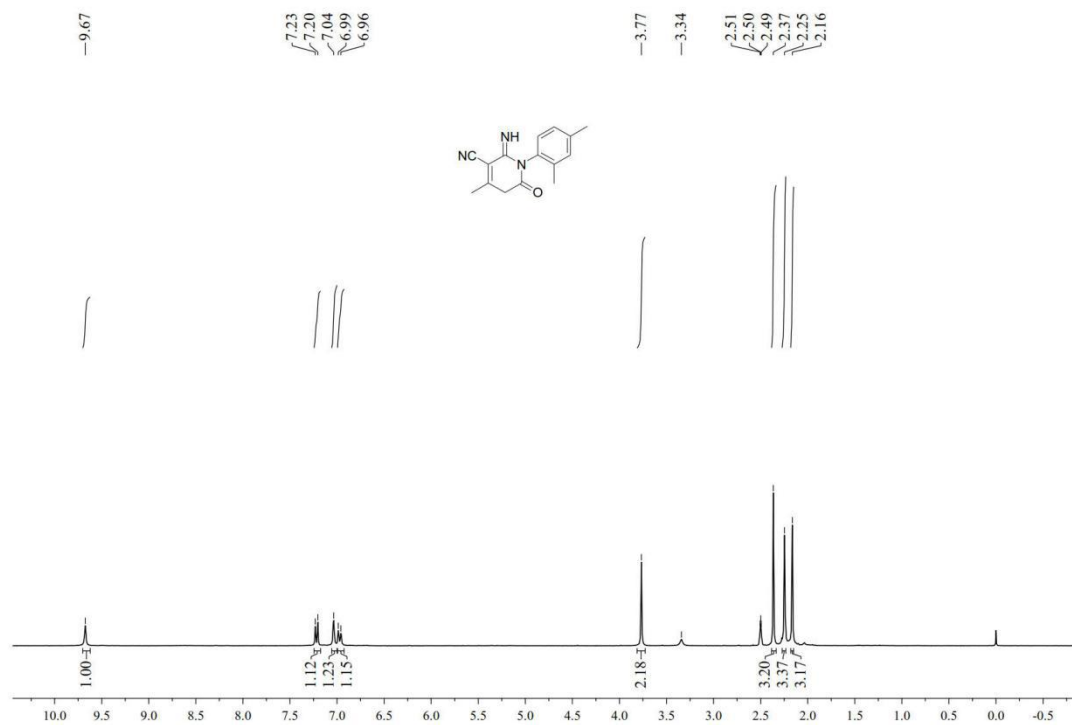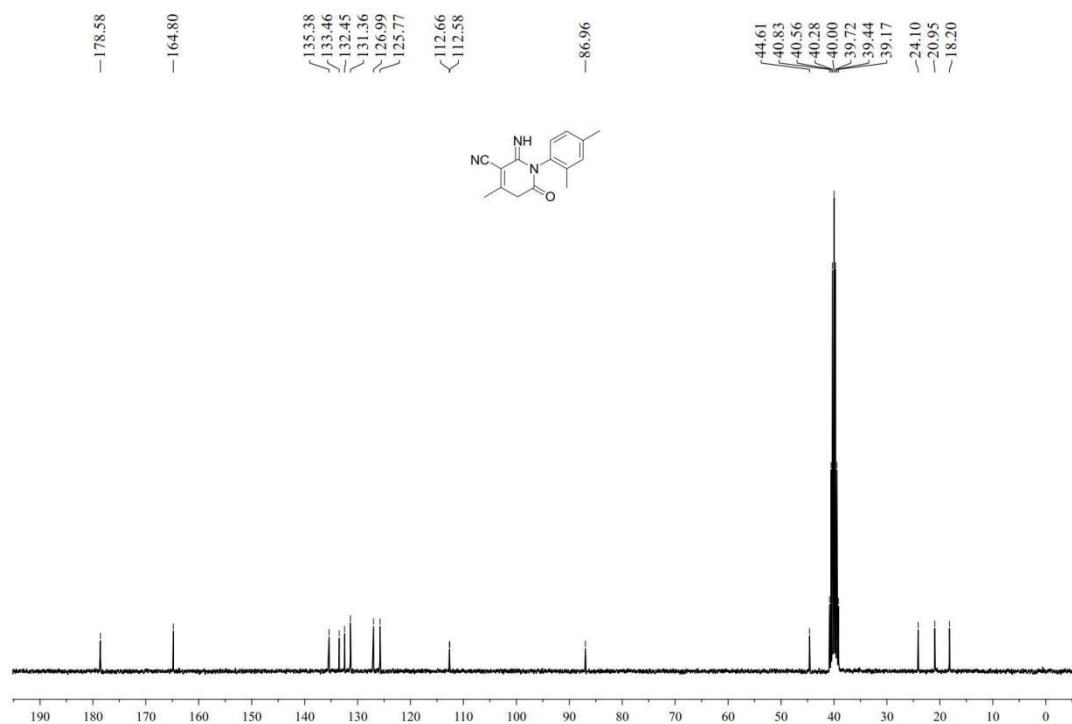

# Compound 4f

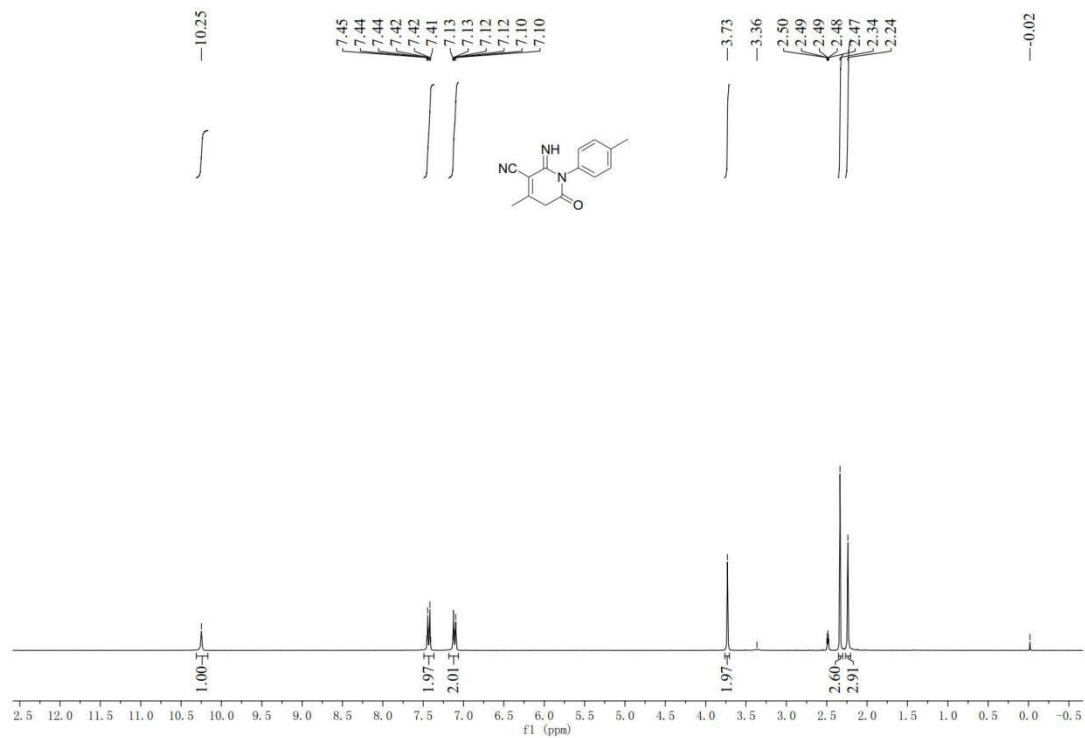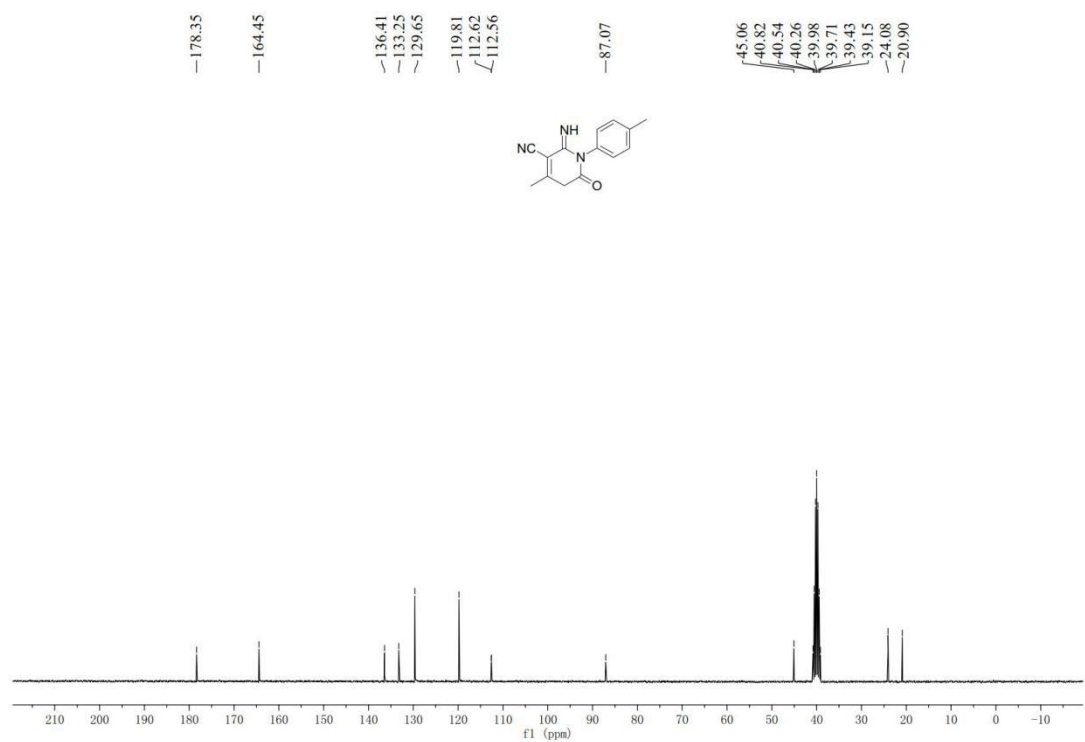



# Compound 4g

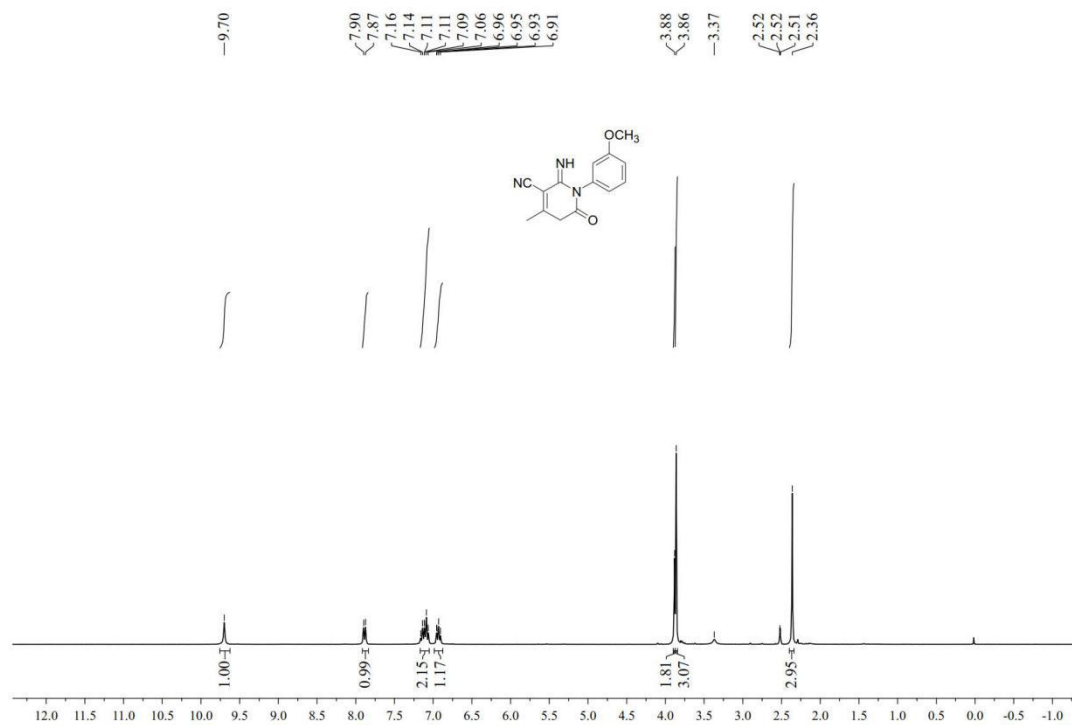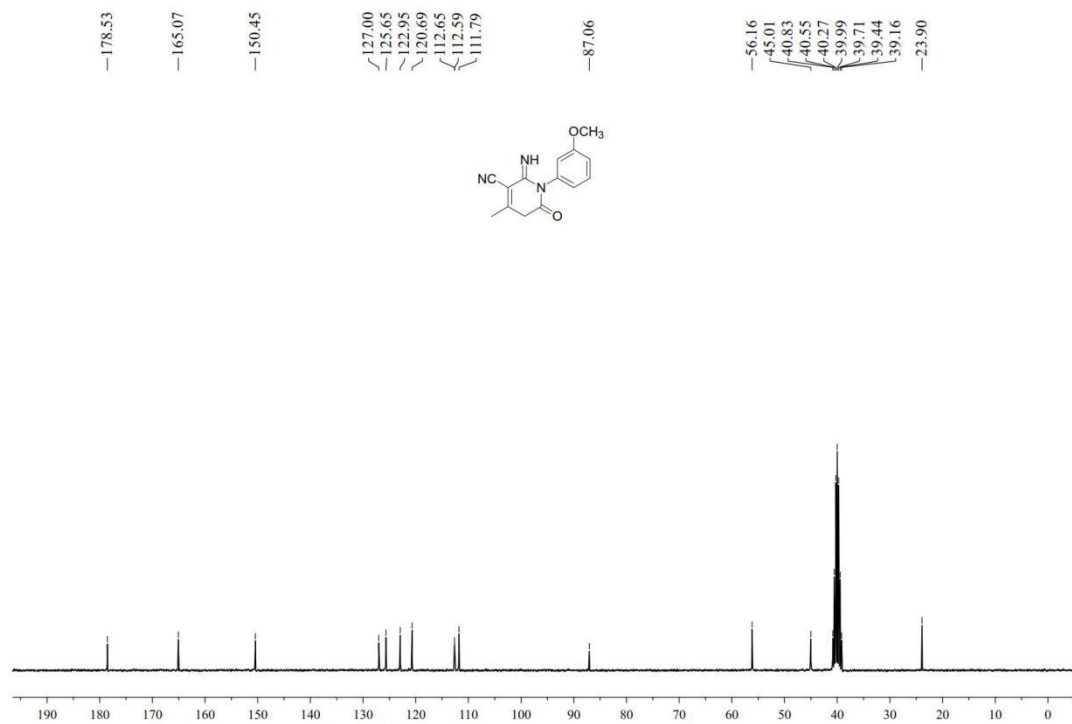

# Compound 4h

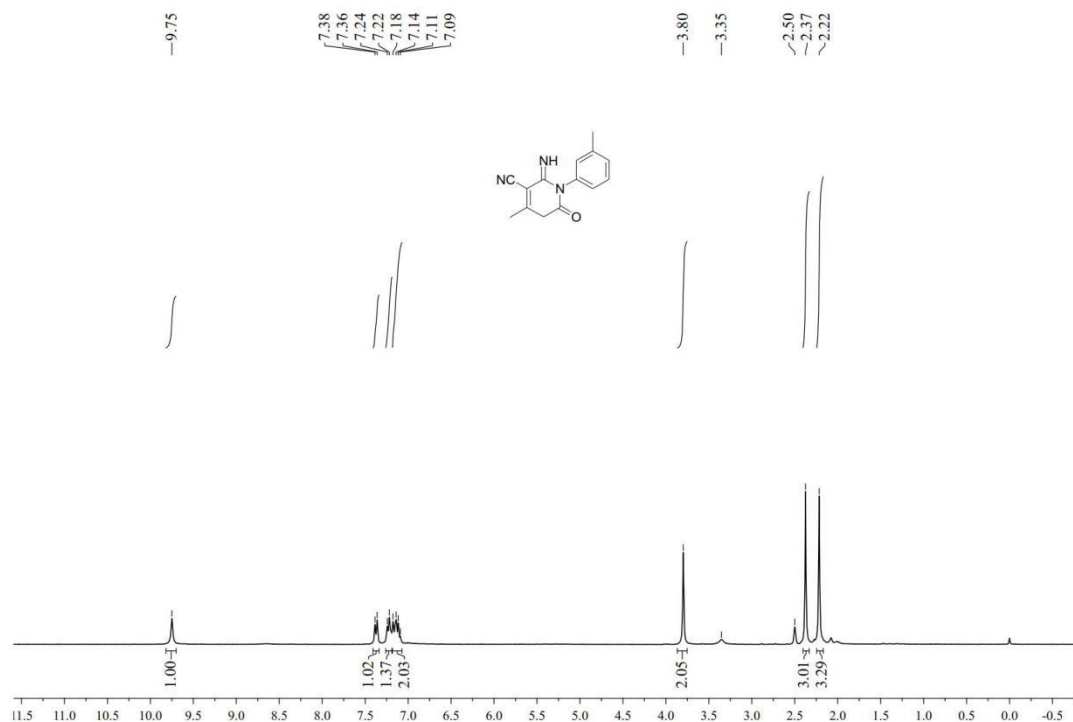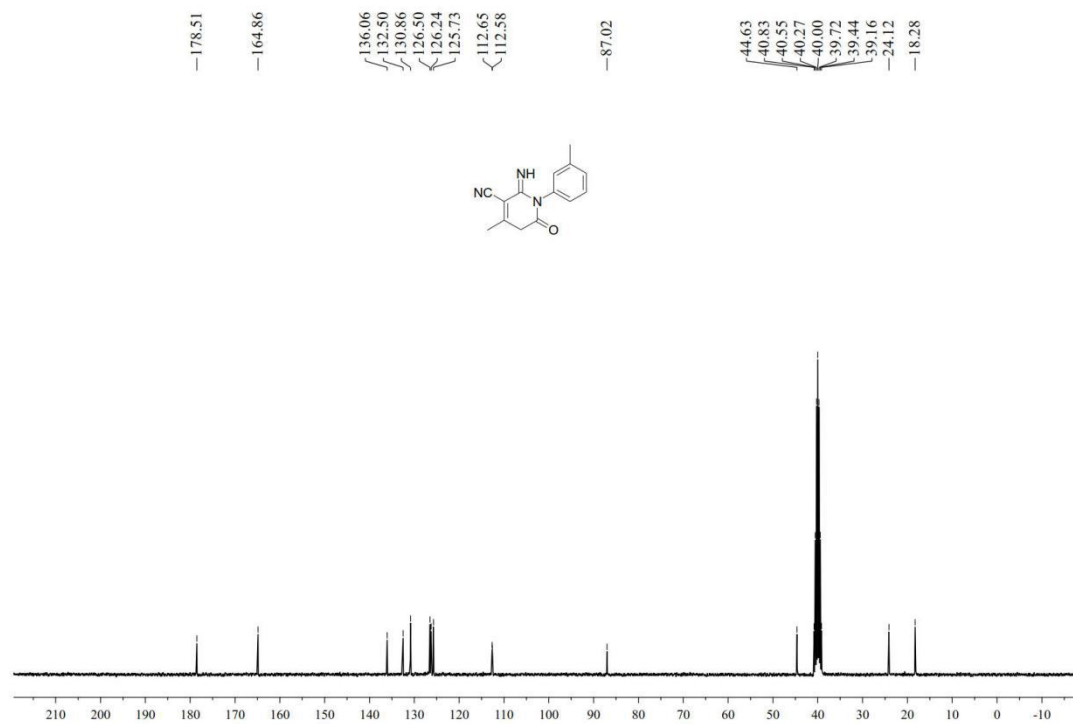

Supplement: c8ra05709e1.pdf [file c8ra05709e1.pdf]
